# Supplementary material for: Virus-induced RGMa expression drives neurodegeneration in HTLV-1–associated myelopathy
Source: JCI journal article supplement (doi:10.1172/jci.insight.184530), 2025-04-24
Supplement: sd1 [file 1]

A

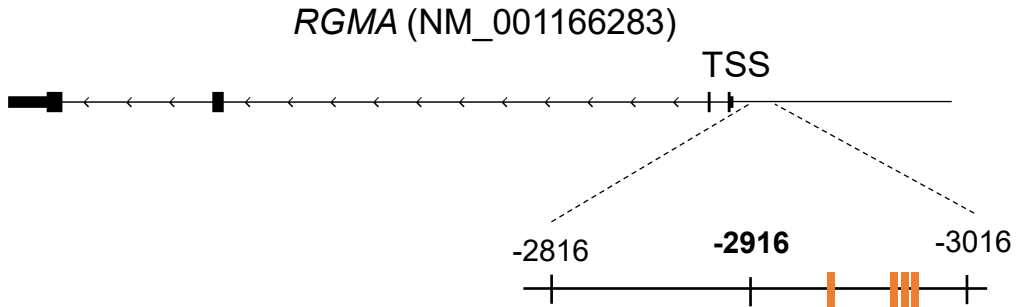

B

| Predicted Sp1 binding site

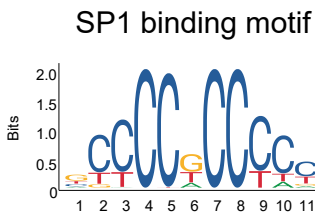

| Predicted sequence | Start | End   | Strand | Relative score (%) |
|--------------------|-------|-------|--------|--------------------|
| TCCCCTCCCTG        | -3007 | -2997 | +      | 91.3               |
| AGGGAGGGG          | -3006 | -2998 | -      | 85.8               |
| GCTCCAGCCCA        | -2986 | -2976 | -      | 81.2               |
| GGGGTGCAG          | -2999 | -2991 | -      | 80.9               |

### Supplementary Figure

Predicted binding of Sp1 in the transcriptional regulatory region of the *RGMA* gene. (A) Schematic illustration of the predicted Sp1 binding site in near the transcription start site (TSS) of the *RGMA* gene. (B) Motif plot for Sp1 (Left). JASPAR analysis results for Sp1 binding sequences located near the TSS of *RGMA* gene at -2916bp (Right). TSS; transcription start site
